# Supplementary material for: A trinuclear ruthenium complex as a highly efficient molecular catalyst for water oxidation
Source: Royal Society of Chemistry journal article supplement (doi:10.1039/c5dt04233j), 2016-01-01
Supplement: c5dt04233j1.pdf [file c5dt04233j1.pdf]

# A Trinuclear Ruthenium Complex as Highly Efficient Molecular Catalyst for Water Oxidation

Linlin Zhang,<sup>a</sup> Yan Gao,<sup>\*,a</sup> Zhao Liu,<sup>a</sup> Xin Ding,<sup>a</sup> Ze Yu<sup>†</sup> and Licheng Sun<sup>\*,a,b</sup>

<sup>a</sup>State Key Laboratory of Fine Chemicals, DUT-KTH Joint Education and Research Center on Molecular Devices, Dalian University of Technology (DUT), Dalian 116024, China.

<sup>b</sup>Department of Chemistry, School of Chemical Science and Engineering, KTH Royal Institute of Technology, Stockholm 10044, Sweden.

Corresponding address:

E-mail: dr.gaoyan@dlut.edu.cn; lichengs@kth.se.

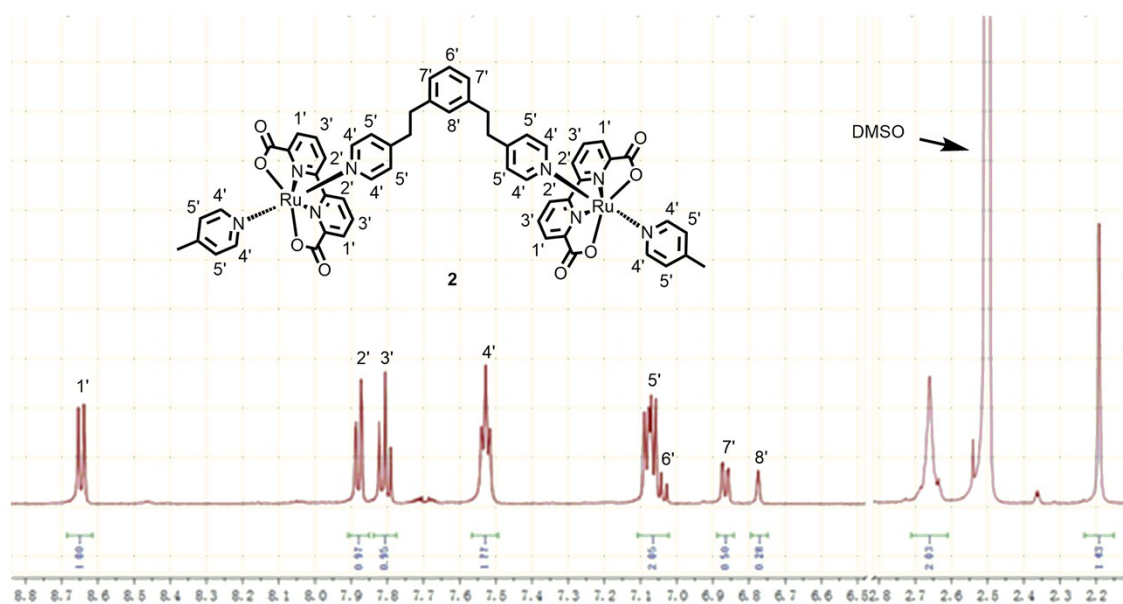

**Figure S1.** <sup>1</sup>H NMR spectrum (400 MHz, d<sub>6</sub>-DMSO) of catalyst 2.

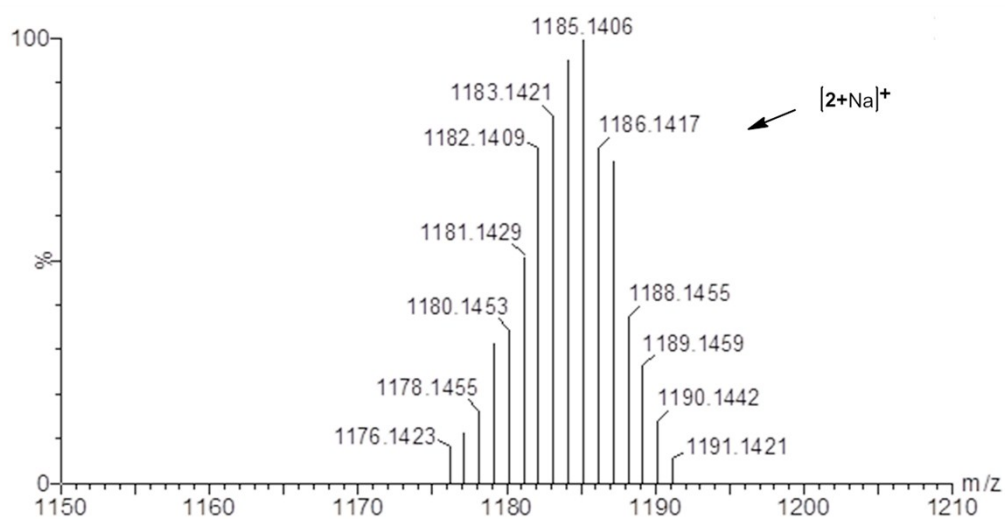

**Figure S2.** HR-MS spectrum of catalyst **2**.

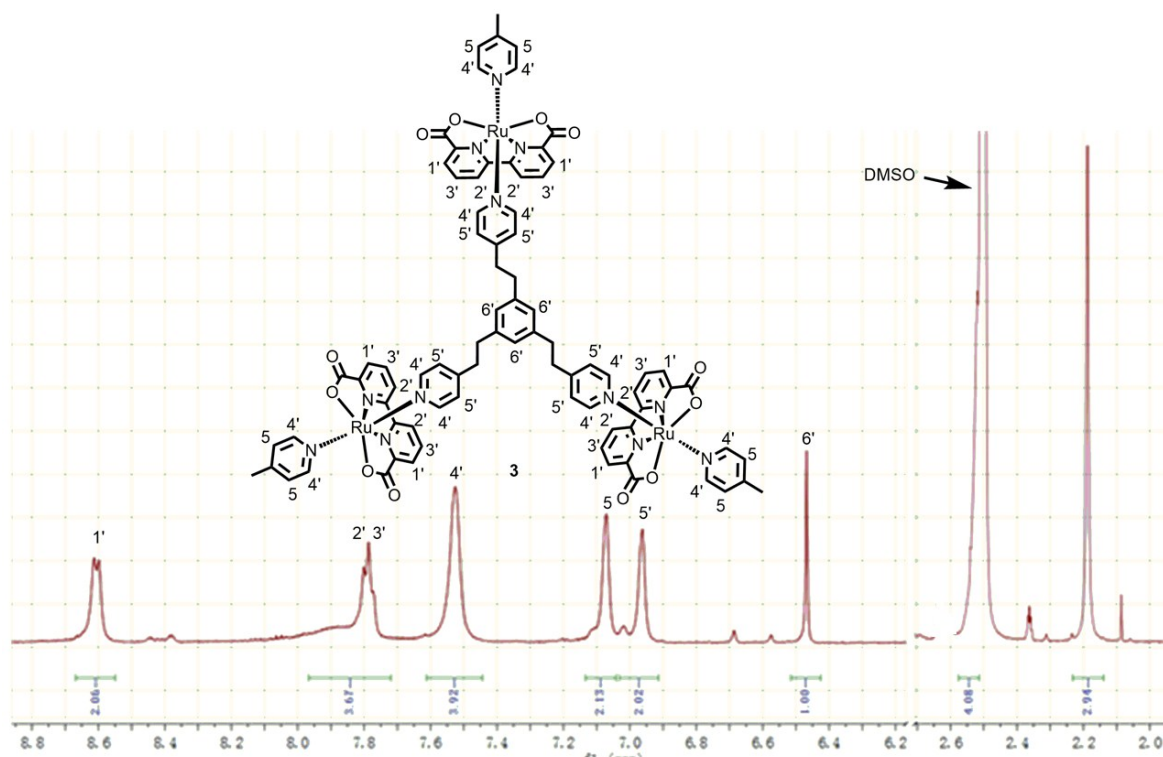

**Figure S3.** <sup>1</sup>H NMR spectrum (400 MHz, d<sub>6</sub>-DMSO) of catalyst **3**.

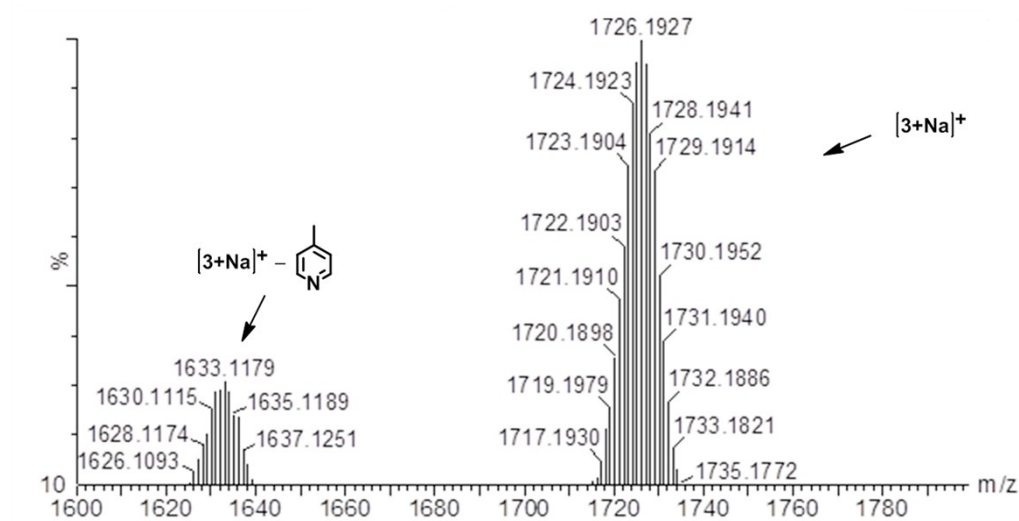

**Figure S4.** HR-MS spectrum of catalyst **3**.

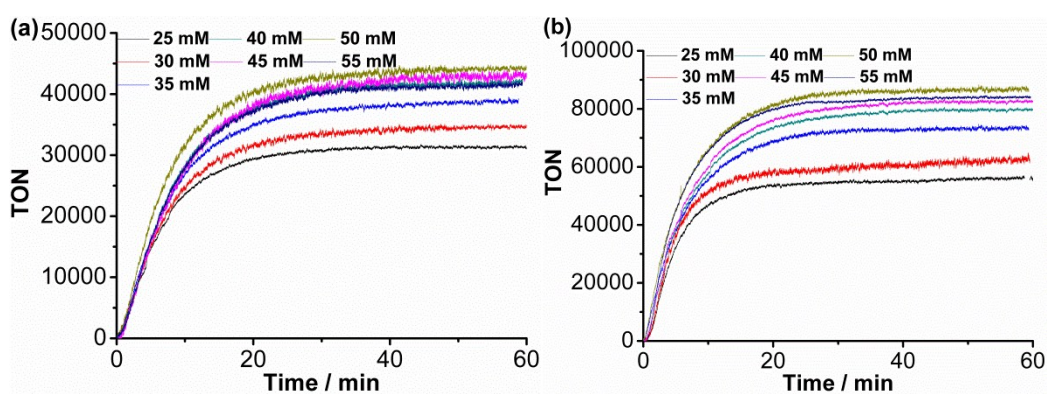

**Figure S5.** TONs of catalysts **2** (a) and **3** (b) under different concentrations of  $\text{Ce}^{\text{IV}}$  based on the amounts of molecular catalysts.

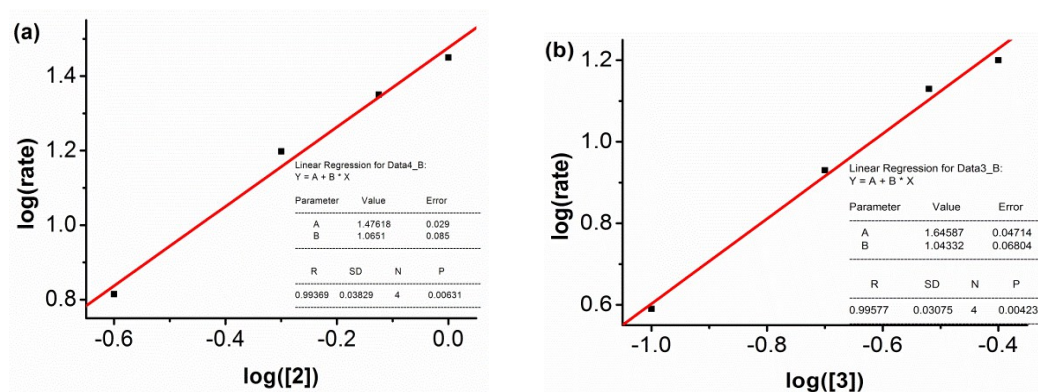

**Figure S6.** (a) The plot of  $\log(\text{rate})$  vs  $\log([2])$  and (b) the plot of  $\log(\text{rate})$  vs  $\log([3])$ .
